# Supplementary material
Source: PubMed Central journal article supplement (PMC5047437)
Supplement: NIHMS787107-supplement-SI3.pdf [file NIHMS787107-supplement-SI3.pdf]

## supplementary materials

## Title

## Computing details

Data collection: Bruker *APEX2*; cell refinement: Bruker *SAINT*; data reduction: Bruker *SAINT*; program(s) used to solve structure: *SHELXS97* (Sheldrick, 2008); program(s) used to refine structure: *SHELXL97* (Sheldrick, 2008); molecular graphics: *ORTEP-3 for Windows* (Farrugia, 2012); software used to prepare material for publication: *SHELXL97* (Sheldrick, 2008).

## (A522B30)

## Crystal data

|                                |                                                         |
|--------------------------------|---------------------------------------------------------|
| $C_{11}H_{16}O_3$              | $Z = 4$                                                 |
| $M_r = 196.24$                 | $F(000) = 424$                                          |
| Triclinic, $P\bar{1}$          | $D_x = 1.238 \text{ Mg m}^{-3}$                         |
| Hall symbol: -P 1              | Cu $K\alpha$ radiation, $\lambda = 1.54184 \text{ \AA}$ |
| $a = 7.1064 (10) \text{ \AA}$  | Cell parameters from 3606 reflections                   |
| $b = 10.1181 (18) \text{ \AA}$ | $\theta = 4.4\text{--}66.8^\circ$                       |
| $c = 14.701 (2) \text{ \AA}$   | $\mu = 0.73 \text{ mm}^{-1}$                            |
| $\alpha = 92.151 (12)^\circ$   | $T = 100 \text{ K}$                                     |
| $\beta = 90.261 (9)^\circ$     | Lath, colourless                                        |
| $\gamma = 94.803 (10)^\circ$   | $0.40 \times 0.09 \times 0.01 \text{ mm}$               |
| $V = 1052.6 (3) \text{ \AA}^3$ |                                                         |

## Data collection

|                                                     |                                                                        |
|-----------------------------------------------------|------------------------------------------------------------------------|
| Bruker Kappa APEX-II DUO diffractometer             | 12697 measured reflections                                             |
| Radiation source: $I\mu\text{S}$ microfocus         | 3628 independent reflections                                           |
| QUAZAR multilayer optics monochromator              | 2604 reflections with $I > 2\sigma(I)$                                 |
| $\varphi$ and $\omega$ scans                        | $R_{\text{int}} = 0.038$                                               |
| Absorption correction: multi-scan                   | $\theta_{\text{max}} = 67.7^\circ$ , $\theta_{\text{min}} = 4.4^\circ$ |
| <i>SADABS</i> (Sheldrick, 2004)                     | $h = -8 \rightarrow 7$                                                 |
| $T_{\text{min}} = 0.760$ , $T_{\text{max}} = 0.993$ | $k = -12 \rightarrow 11$                                               |
|                                                     | $l = -16 \rightarrow 17$                                               |

## Refinement

|                                                                |                                                          |
|----------------------------------------------------------------|----------------------------------------------------------|
| Refinement on $F^2$                                            | Secondary atom site location: difference Fourier map     |
| Least-squares matrix: full                                     | Hydrogen site location: inferred from neighbouring sites |
| $R[F^2 > 2\sigma(F^2)] = 0.048$                                | H-atom parameters constrained                            |
| $wR(F^2) = 0.137$                                              | $w = 1/[\sigma^2(F_o^2) + (0.0616P)^2 + 0.5257P]$        |
| $S = 1.03$                                                     | where $P = (F_o^2 + 2F_c^2)/3$                           |
| 3628 reflections                                               | $(\Delta/\sigma)_{\text{max}} = 0.001$                   |
| 295 parameters                                                 | $\Delta\rho_{\text{max}} = 0.51 \text{ e \AA}^{-3}$      |
| 4 restraints                                                   | $\Delta\rho_{\text{min}} = -0.29 \text{ e \AA}^{-3}$     |
| Primary atom site location: structure-invariant direct methods |                                                          |

Special details

Refinement

Refinement of  $F^2$  against ALL reflections. The weighted  $R$ -factor  $wR$  and goodness of fit  $S$  are based on  $F^2$ , conventional  $R$ -factors  $R$  are based on  $F$ , with  $F$  set to zero for negative  $F^2$ . The threshold expression of  $F^2 > \sigma(F^2)$  is used only for calculating  $R$ -factors(gt) etc. and is not relevant to the choice of reflections for refinement.  $R$ -factors based on  $F^2$  are statistically about twice as large as those based on  $F$ , and  $R$ -factors based on ALL data will be even larger.

Fractional atomic coordinates and isotropic or equivalent isotropic displacement parameters ( $\text{\AA}^2$ )

|      | <i>x</i>     | <i>y</i>     | <i>z</i>     | $U_{\text{iso}}^*/U_{\text{eq}}$ | Occ. (<1) |
|------|--------------|--------------|--------------|----------------------------------|-----------|
| O1   | 0.17616 (19) | 0.19910 (16) | 0.87649 (10) | 0.0359 (4)                       |           |
| O2   | 0.4542 (2)   | 0.11637 (18) | 0.88113 (10) | 0.0418 (4)                       |           |
| O3   | 0.05843 (19) | 0.11705 (16) | 1.13956 (9)  | 0.0351 (4)                       |           |
| C1   | 0.3128 (3)   | 0.1387 (2)   | 0.92386 (15) | 0.0342 (5)                       |           |
| C2   | 0.2741 (3)   | 0.1100 (2)   | 1.01536 (14) | 0.0328 (5)                       |           |
| H2   | 0.3636       | 0.0687       | 1.0505       | 0.039*                           |           |
| C3   | 0.1081 (3)   | 0.1415 (2)   | 1.05346 (14) | 0.0308 (5)                       |           |
| C4   | -0.0310 (3)  | 0.2048 (2)   | 1.00229 (14) | 0.0314 (5)                       |           |
| C5   | 0.0084 (3)   | 0.2300 (2)   | 0.91579 (15) | 0.0334 (5)                       |           |
| C6   | -0.1083 (3)  | 0.2942 (3)   | 0.84814 (16) | 0.0401 (6)                       |           |
| H6A  | -0.0731      | 0.3900       | 0.8498       | 0.060*                           |           |
| H6B  | -0.2423      | 0.2779       | 0.8632       | 0.060*                           |           |
| H6C  | -0.0862      | 0.2569       | 0.7870       | 0.060*                           |           |
| C7   | -0.2086 (3)  | 0.2433 (2)   | 1.04914 (15) | 0.0366 (6)                       |           |
| H7A  | -0.2553      | 0.1717       | 1.0894       | 0.044*                           |           |
| H7B  | -0.3074      | 0.2529       | 1.0027       | 0.044*                           |           |
| C8   | -0.1742 (3)  | 0.3734 (3)   | 1.10548 (18) | 0.0510 (7)                       |           |
| H8A  | -0.1500      | 0.4473       | 1.0637       | 0.061*                           |           |
| H8B  | -0.0597      | 0.3694       | 1.1436       | 0.061*                           |           |
| C9   | -0.3423 (5)  | 0.4031 (4)   | 1.1681 (2)   | 0.0791 (11)                      |           |
| H9A  | -0.3794      | 0.3231       | 1.2028       | 0.095*                           |           |
| H9B  | -0.2995      | 0.4754       | 1.2125       | 0.095*                           |           |
| C10  | -0.5093 (5)  | 0.4415 (4)   | 1.1195 (3)   | 0.0777 (10)                      |           |
| H10A | -0.5492      | 0.3727       | 1.0731       | 0.117*                           |           |
| H10B | -0.4779      | 0.5259       | 1.0903       | 0.117*                           |           |
| H10C | -0.6120      | 0.4515       | 1.1628       | 0.117*                           |           |
| C11  | 0.1963 (3)   | 0.0633 (3)   | 1.19711 (15) | 0.0405 (6)                       |           |
| H11A | 0.3047       | 0.1290       | 1.2067       | 0.061*                           |           |
| H11B | 0.2386       | -0.0174      | 1.1678       | 0.061*                           |           |
| H11C | 0.1393       | 0.0421       | 1.2559       | 0.061*                           |           |
| O4   | 0.67524 (19) | 0.19602 (15) | 0.63291 (9)  | 0.0335 (4)                       |           |
| O5   | 0.9538 (2)   | 0.11362 (18) | 0.62534 (10) | 0.0432 (4)                       |           |
| O6   | 0.56163 (19) | 0.11883 (16) | 0.36371 (9)  | 0.0353 (4)                       |           |
| C12  | 0.8125 (3)   | 0.1372 (2)   | 0.58281 (14) | 0.0332 (5)                       |           |
| C13  | 0.7761 (3)   | 0.1114 (2)   | 0.48899 (14) | 0.0320 (5)                       |           |
| H13  | 0.8677       | 0.0731       | 0.4518       | 0.038*                           |           |
| C14  | 0.6098 (3)   | 0.1415 (2)   | 0.45174 (14) | 0.0300 (5)                       |           |
| C15  | 0.4695 (3)   | 0.2025 (2)   | 0.50602 (15) | 0.0331 (5)                       |           |
| C16  | 0.5089 (3)   | 0.2273 (2)   | 0.59468 (14) | 0.0320 (5)                       |           |
| C17  | 0.3913 (3)   | 0.2922 (3)   | 0.66436 (16) | 0.0416 (6)                       |           |
| H17A | 0.4274       | 0.3879       | 0.6678       | 0.062*                           |           |
| H17B | 0.4117       | 0.2549       | 0.7238       | 0.062*                           |           |
| H17C | 0.2577       | 0.2765       | 0.6472       | 0.062*                           |           |
| C18A | 0.3043 (13)  | 0.2602 (11)  | 0.4554 (9)   | 0.029 (3)                        | 0.469 (8) |

|      |             |             |              |             |           |
|------|-------------|-------------|--------------|-------------|-----------|
| H18A | 0.2510      | 0.1912      | 0.4109       | 0.035*      | 0.469 (8) |
| H18B | 0.2046      | 0.2749      | 0.5006       | 0.035*      | 0.469 (8) |
| C19A | 0.3432 (11) | 0.3883 (9)  | 0.4050 (5)   | 0.0351 (18) | 0.469 (8) |
| H19A | 0.4586      | 0.3814      | 0.3682       | 0.042*      | 0.469 (8) |
| H19B | 0.3696      | 0.4623      | 0.4504       | 0.042*      | 0.469 (8) |
| C20A | 0.1832 (9)  | 0.4231 (7)  | 0.3419 (4)   | 0.0465 (19) | 0.469 (8) |
| H20A | 0.2300      | 0.4993      | 0.3056       | 0.056*      | 0.469 (8) |
| H20B | 0.1509      | 0.3467      | 0.2990       | 0.056*      | 0.469 (8) |
| C21A | 0.0059 (9)  | 0.4574 (8)  | 0.3904 (5)   | 0.061 (2)   | 0.469 (8) |
| H21A | -0.0893     | 0.4769      | 0.3455       | 0.092*      | 0.469 (8) |
| H21B | 0.0348      | 0.5354      | 0.4312       | 0.092*      | 0.469 (8) |
| H21C | -0.0430     | 0.3822      | 0.4260       | 0.092*      | 0.469 (8) |
| C18B | 0.2745 (11) | 0.2181 (10) | 0.4664 (8)   | 0.0252 (18) | 0.531 (8) |
| H18C | 0.2424      | 0.1485      | 0.4184       | 0.030*      | 0.531 (8) |
| H18D | 0.1779      | 0.2098      | 0.5146       | 0.030*      | 0.531 (8) |
| C19B | 0.2796 (9)  | 0.3539 (8)  | 0.4267 (5)   | 0.0343 (15) | 0.531 (8) |
| H19C | 0.3873      | 0.3652      | 0.3844       | 0.041*      | 0.531 (8) |
| H19D | 0.2990      | 0.4227      | 0.4762       | 0.041*      | 0.531 (8) |
| C20B | 0.0966 (7)  | 0.3723 (5)  | 0.3757 (4)   | 0.0382 (15) | 0.531 (8) |
| H20C | 0.0876      | 0.3125      | 0.3207       | 0.046*      | 0.531 (8) |
| H20D | -0.0120     | 0.3467      | 0.4152       | 0.046*      | 0.531 (8) |
| C21B | 0.0847 (8)  | 0.5145 (6)  | 0.3476 (4)   | 0.0552 (18) | 0.531 (8) |
| H21D | -0.0346     | 0.5213      | 0.3151       | 0.083*      | 0.531 (8) |
| H21E | 0.1905      | 0.5399      | 0.3076       | 0.083*      | 0.531 (8) |
| H21F | 0.0904      | 0.5739      | 0.4019       | 0.083*      | 0.531 (8) |
| C22  | 0.6998 (3)  | 0.0659 (3)  | 0.30421 (15) | 0.0410 (6)  |           |
| H22A | 0.8084      | 0.1315      | 0.2992       | 0.062*      |           |
| H22B | 0.6434      | 0.0455      | 0.2438       | 0.062*      |           |
| H22C | 0.7414      | -0.0154     | 0.3292       | 0.062*      |           |

Atomic displacement parameters ( $\text{\AA}^2$ )

|     | $U^{11}$    | $U^{22}$    | $U^{33}$    | $U^{12}$    | $U^{13}$     | $U^{23}$     |
|-----|-------------|-------------|-------------|-------------|--------------|--------------|
| O1  | 0.0258 (7)  | 0.0541 (10) | 0.0288 (8)  | 0.0129 (7)  | -0.0015 (6)  | -0.0047 (7)  |
| O2  | 0.0265 (8)  | 0.0708 (12) | 0.0295 (8)  | 0.0159 (7)  | 0.0014 (6)   | -0.0082 (8)  |
| O3  | 0.0259 (7)  | 0.0554 (10) | 0.0257 (8)  | 0.0161 (7)  | -0.0015 (6)  | -0.0044 (7)  |
| C1  | 0.0225 (10) | 0.0490 (14) | 0.0314 (12) | 0.0111 (9)  | -0.0055 (9)  | -0.0097 (10) |
| C2  | 0.0227 (10) | 0.0487 (14) | 0.0277 (11) | 0.0118 (9)  | -0.0046 (8)  | -0.0074 (10) |
| C3  | 0.0252 (10) | 0.0423 (13) | 0.0250 (11) | 0.0089 (9)  | -0.0028 (8)  | -0.0094 (10) |
| C4  | 0.0241 (10) | 0.0415 (13) | 0.0293 (12) | 0.0109 (9)  | -0.0043 (8)  | -0.0099 (10) |
| C5  | 0.0236 (10) | 0.0428 (14) | 0.0343 (12) | 0.0098 (9)  | -0.0030 (9)  | -0.0090 (10) |
| C6  | 0.0353 (12) | 0.0507 (15) | 0.0362 (13) | 0.0142 (11) | -0.0048 (10) | 0.0014 (11)  |
| C7  | 0.0236 (10) | 0.0542 (15) | 0.0332 (12) | 0.0156 (10) | -0.0039 (9)  | -0.0086 (11) |
| C8  | 0.0408 (14) | 0.0626 (18) | 0.0508 (16) | 0.0221 (12) | -0.0064 (11) | -0.0206 (14) |
| C9  | 0.078 (2)   | 0.083 (2)   | 0.081 (2)   | 0.0482 (19) | -0.0105 (18) | -0.0382 (19) |
| C10 | 0.067 (2)   | 0.078 (2)   | 0.092 (3)   | 0.0345 (18) | 0.0070 (18)  | -0.0028 (19) |
| C11 | 0.0338 (12) | 0.0634 (17) | 0.0268 (12) | 0.0223 (11) | -0.0035 (9)  | -0.0035 (11) |
| O4  | 0.0265 (7)  | 0.0492 (10) | 0.0262 (8)  | 0.0150 (7)  | -0.0032 (6)  | -0.0065 (7)  |
| O5  | 0.0343 (8)  | 0.0691 (12) | 0.0292 (8)  | 0.0268 (8)  | -0.0078 (7)  | -0.0060 (8)  |
| O6  | 0.0295 (8)  | 0.0557 (10) | 0.0229 (8)  | 0.0195 (7)  | -0.0046 (6)  | -0.0068 (7)  |
| C12 | 0.0270 (11) | 0.0456 (14) | 0.0288 (12) | 0.0159 (9)  | -0.0024 (9)  | -0.0029 (10) |
| C13 | 0.0276 (11) | 0.0440 (14) | 0.0262 (11) | 0.0168 (9)  | -0.0012 (8)  | -0.0042 (10) |
| C14 | 0.0284 (11) | 0.0389 (13) | 0.0236 (11) | 0.0092 (9)  | -0.0026 (8)  | -0.0022 (9)  |
| C15 | 0.0225 (10) | 0.0458 (14) | 0.0318 (12) | 0.0106 (9)  | -0.0026 (9)  | -0.0056 (10) |

|      |             |             |             |             |             |              |
|------|-------------|-------------|-------------|-------------|-------------|--------------|
| C16  | 0.0221 (10) | 0.0434 (14) | 0.0311 (12) | 0.0094 (9)  | -0.0020 (8) | -0.0043 (10) |
| C17  | 0.0309 (12) | 0.0620 (17) | 0.0327 (13) | 0.0139 (11) | 0.0009 (9)  | -0.0101 (12) |
| C18A | 0.015 (3)   | 0.045 (8)   | 0.027 (4)   | -0.002 (4)  | 0.005 (3)   | -0.002 (5)   |
| C19A | 0.030 (4)   | 0.041 (5)   | 0.037 (4)   | 0.016 (3)   | -0.002 (3)  | 0.008 (3)    |
| C20A | 0.049 (4)   | 0.047 (4)   | 0.046 (4)   | 0.014 (3)   | -0.012 (3)  | 0.014 (3)    |
| C21A | 0.042 (4)   | 0.063 (5)   | 0.083 (5)   | 0.026 (4)   | -0.009 (3)  | 0.016 (4)    |
| C18B | 0.015 (3)   | 0.034 (5)   | 0.027 (3)   | 0.001 (3)   | 0.001 (3)   | 0.005 (3)    |
| C19B | 0.029 (3)   | 0.028 (4)   | 0.047 (4)   | 0.005 (3)   | -0.005 (3)  | 0.010 (3)    |
| C20B | 0.028 (2)   | 0.039 (3)   | 0.049 (3)   | 0.011 (2)   | -0.005 (2)  | 0.015 (2)    |
| C21B | 0.042 (3)   | 0.053 (4)   | 0.075 (4)   | 0.019 (3)   | -0.002 (3)  | 0.033 (3)    |
| C22  | 0.0369 (12) | 0.0633 (17) | 0.0259 (12) | 0.0267 (11) | -0.0023 (9) | -0.0081 (11) |

*Geometric parameters (Å, °)*

|           |             |              |            |
|-----------|-------------|--------------|------------|
| O1—C5     | 1.381 (2)   | C13—H13      | 0.9500     |
| O1—C1     | 1.388 (3)   | C14—C15      | 1.444 (3)  |
| O2—C1     | 1.220 (2)   | C15—C16      | 1.342 (3)  |
| O3—C3     | 1.342 (3)   | C15—C18B     | 1.524 (8)  |
| O3—C11    | 1.445 (3)   | C15—C18A     | 1.553 (10) |
| C1—C2     | 1.410 (3)   | C16—C17      | 1.492 (3)  |
| C2—C3     | 1.365 (3)   | C17—H17A     | 0.9800     |
| C2—H2     | 0.9500      | C17—H17B     | 0.9800     |
| C3—C4     | 1.445 (3)   | C17—H17C     | 0.9800     |
| C4—C5     | 1.333 (3)   | C18A—C19A    | 1.523 (9)  |
| C4—C7     | 1.513 (3)   | C18A—H18A    | 0.9900     |
| C5—C6     | 1.493 (3)   | C18A—H18B    | 0.9900     |
| C6—H6A    | 0.9800      | C19A—C20A    | 1.535 (8)  |
| C6—H6B    | 0.9800      | C19A—H19A    | 0.9900     |
| C6—H6C    | 0.9800      | C19A—H19B    | 0.9900     |
| C7—C8     | 1.530 (3)   | C20A—C21A    | 1.510 (9)  |
| C7—H7A    | 0.9900      | C20A—H20A    | 0.9900     |
| C7—H7B    | 0.9900      | C20A—H20B    | 0.9900     |
| C8—C9     | 1.554 (4)   | C21A—H21A    | 0.9800     |
| C8—H8A    | 0.9900      | C21A—H21B    | 0.9800     |
| C8—H8B    | 0.9900      | C21A—H21C    | 0.9800     |
| C9—C10    | 1.469 (4)   | C18B—C19B    | 1.510 (8)  |
| C9—H9A    | 0.9900      | C18B—H18C    | 0.9900     |
| C9—H9B    | 0.9900      | C18B—H18D    | 0.9900     |
| C10—H10A  | 0.9800      | C19B—C20B    | 1.526 (7)  |
| C10—H10B  | 0.9800      | C19B—H19C    | 0.9900     |
| C10—H10C  | 0.9800      | C19B—H19D    | 0.9900     |
| C11—H11A  | 0.9800      | C20B—C21B    | 1.521 (8)  |
| C11—H11B  | 0.9800      | C20B—H20C    | 0.9900     |
| C11—H11C  | 0.9800      | C20B—H20D    | 0.9900     |
| O4—C16    | 1.373 (2)   | C21B—H21D    | 0.9800     |
| O4—C12    | 1.386 (2)   | C21B—H21E    | 0.9800     |
| O5—C12    | 1.225 (2)   | C21B—H21F    | 0.9800     |
| O6—C14    | 1.343 (2)   | C22—H22A     | 0.9800     |
| O6—C22    | 1.441 (2)   | C22—H22B     | 0.9800     |
| C12—C13   | 1.413 (3)   | C22—H22C     | 0.9800     |
| C13—C14   | 1.362 (3)   |              |            |
| C5—O1—C1  | 122.37 (17) | C16—C15—C18A | 123.6 (5)  |
| C3—O3—C11 | 117.44 (15) | C14—C15—C18A | 117.8 (5)  |

|               |             |                |             |
|---------------|-------------|----------------|-------------|
| O2—C1—O1      | 115.8 (2)   | C18B—C15—C18A  | 18.4 (4)    |
| O2—C1—C2      | 127.1 (2)   | C15—C16—O4     | 121.73 (18) |
| O1—C1—C2      | 117.05 (17) | C15—C16—C17    | 127.92 (19) |
| C3—C2—C1      | 120.0 (2)   | O4—C16—C17     | 110.33 (17) |
| C3—C2—H2      | 120.0       | C16—C17—H17A   | 109.5       |
| C1—C2—H2      | 120.0       | C16—C17—H17B   | 109.5       |
| O3—C3—C2      | 124.18 (19) | H17A—C17—H17B  | 109.5       |
| O3—C3—C4      | 114.26 (17) | C16—C17—H17C   | 109.5       |
| C2—C3—C4      | 121.57 (19) | H17A—C17—H17C  | 109.5       |
| C5—C4—C3      | 117.27 (18) | H17B—C17—H17C  | 109.5       |
| C5—C4—C7      | 123.34 (19) | C19A—C18A—C15  | 119.0 (6)   |
| C3—C4—C7      | 119.35 (19) | C19A—C18A—H18A | 107.6       |
| C4—C5—O1      | 121.75 (19) | C15—C18A—H18A  | 107.6       |
| C4—C5—C6      | 128.45 (19) | C19A—C18A—H18B | 107.6       |
| O1—C5—C6      | 109.78 (18) | C15—C18A—H18B  | 107.6       |
| C5—C6—H6A     | 109.5       | H18A—C18A—H18B | 107.0       |
| C5—C6—H6B     | 109.5       | C18A—C19A—C20A | 115.2 (7)   |
| H6A—C6—H6B    | 109.5       | C18A—C19A—H19A | 108.5       |
| C5—C6—H6C     | 109.5       | C20A—C19A—H19A | 108.5       |
| H6A—C6—H6C    | 109.5       | C18A—C19A—H19B | 108.5       |
| H6B—C6—H6C    | 109.5       | C20A—C19A—H19B | 108.5       |
| C4—C7—C8      | 111.90 (19) | H19A—C19A—H19B | 107.5       |
| C4—C7—H7A     | 109.2       | C21A—C20A—C19A | 114.6 (5)   |
| C8—C7—H7A     | 109.2       | C21A—C20A—H20A | 108.6       |
| C4—C7—H7B     | 109.2       | C19A—C20A—H20A | 108.6       |
| C8—C7—H7B     | 109.2       | C21A—C20A—H20B | 108.6       |
| H7A—C7—H7B    | 107.9       | C19A—C20A—H20B | 108.6       |
| C7—C8—C9      | 113.3 (2)   | H20A—C20A—H20B | 107.6       |
| C7—C8—H8A     | 108.9       | C20A—C21A—H21A | 109.5       |
| C9—C8—H8A     | 108.9       | C20A—C21A—H21B | 109.5       |
| C7—C8—H8B     | 108.9       | H21A—C21A—H21B | 109.5       |
| C9—C8—H8B     | 108.9       | C20A—C21A—H21C | 109.5       |
| H8A—C8—H8B    | 107.7       | H21A—C21A—H21C | 109.5       |
| C10—C9—C8     | 114.4 (3)   | H21B—C21A—H21C | 109.5       |
| C10—C9—H9A    | 108.7       | C19B—C18B—C15  | 107.6 (6)   |
| C8—C9—H9A     | 108.7       | C19B—C18B—H18C | 110.2       |
| C10—C9—H9B    | 108.7       | C15—C18B—H18C  | 110.2       |
| C8—C9—H9B     | 108.7       | C19B—C18B—H18D | 110.2       |
| H9A—C9—H9B    | 107.6       | C15—C18B—H18D  | 110.2       |
| C9—C10—H10A   | 109.5       | H18C—C18B—H18D | 108.5       |
| C9—C10—H10B   | 109.5       | C18B—C19B—C20B | 111.2 (6)   |
| H10A—C10—H10B | 109.5       | C18B—C19B—H19C | 109.4       |
| C9—C10—H10C   | 109.5       | C20B—C19B—H19C | 109.4       |
| H10A—C10—H10C | 109.5       | C18B—C19B—H19D | 109.4       |
| H10B—C10—H10C | 109.5       | C20B—C19B—H19D | 109.4       |
| O3—C11—H11A   | 109.5       | H19C—C19B—H19D | 108.0       |
| O3—C11—H11B   | 109.5       | C21B—C20B—C19B | 112.5 (5)   |
| H11A—C11—H11B | 109.5       | C21B—C20B—H20C | 109.1       |
| O3—C11—H11C   | 109.5       | C19B—C20B—H20C | 109.1       |
| H11A—C11—H11C | 109.5       | C21B—C20B—H20D | 109.1       |
| H11B—C11—H11C | 109.5       | C19B—C20B—H20D | 109.1       |
| C16—O4—C12    | 122.36 (16) | H20C—C20B—H20D | 107.8       |
| C14—O6—C22    | 117.48 (16) | C20B—C21B—H21D | 109.5       |
| O5—C12—O4     | 115.77 (18) | C20B—C21B—H21E | 109.5       |

|                |              |                     |            |
|----------------|--------------|---------------------|------------|
| O5—C12—C13     | 127.06 (18)  | H21D—C21B—H21E      | 109.5      |
| O4—C12—C13     | 117.17 (17)  | C20B—C21B—H21F      | 109.5      |
| C14—C13—C12    | 120.10 (18)  | H21D—C21B—H21F      | 109.5      |
| C14—C13—H13    | 119.9        | H21E—C21B—H21F      | 109.5      |
| C12—C13—H13    | 119.9        | O6—C22—H22A         | 109.5      |
| O6—C14—C13     | 124.30 (18)  | O6—C22—H22B         | 109.5      |
| O6—C14—C15     | 114.44 (17)  | H22A—C22—H22B       | 109.5      |
| C13—C14—C15    | 121.26 (19)  | O6—C22—H22C         | 109.5      |
| C16—C15—C14    | 117.36 (18)  | H22A—C22—H22C       | 109.5      |
| C16—C15—C18B   | 121.7 (5)    | H22B—C22—H22C       | 109.5      |
| C14—C15—C18B   | 120.3 (5)    |                     |            |
|                |              |                     |            |
| C5—O1—C1—O2    | 179.7 (2)    | C22—O6—C14—C15      | 176.2 (2)  |
| C5—O1—C1—C2    | -0.3 (3)     | C12—C13—C14—O6      | -179.0 (2) |
| O2—C1—C2—C3    | 180.0 (2)    | C12—C13—C14—C15     | 1.4 (4)    |
| O1—C1—C2—C3    | 0.0 (3)      | O6—C14—C15—C16      | 179.7 (2)  |
| C11—O3—C3—C2   | 5.0 (3)      | C13—C14—C15—C16     | -0.6 (3)   |
| C11—O3—C3—C4   | -175.30 (19) | O6—C14—C15—C18B     | 8.6 (5)    |
| C1—C2—C3—O3    | 179.4 (2)    | C13—C14—C15—C18B    | -171.7 (4) |
| C1—C2—C3—C4    | -0.3 (3)     | O6—C14—C15—C18A     | -12.3 (5)  |
| O3—C3—C4—C5    | -179.0 (2)   | C13—C14—C15—C18A    | 167.4 (5)  |
| C2—C3—C4—C5    | 0.8 (3)      | C14—C15—C16—O4      | -0.1 (3)   |
| O3—C3—C4—C7    | 3.1 (3)      | C18B—C15—C16—O4     | 170.9 (5)  |
| C2—C3—C4—C7    | -177.2 (2)   | C18A—C15—C16—O4     | -167.4 (5) |
| C3—C4—C5—O1    | -1.0 (3)     | C14—C15—C16—C17     | 178.2 (2)  |
| C7—C4—C5—O1    | 176.8 (2)    | C18B—C15—C16—C17    | -10.8 (6)  |
| C3—C4—C5—C6    | -179.8 (2)   | C18A—C15—C16—C17    | 11.0 (6)   |
| C7—C4—C5—C6    | -1.9 (4)     | C12—O4—C16—C15      | 0.0 (3)    |
| C1—O1—C5—C4    | 0.9 (3)      | C12—O4—C16—C17      | -178.7 (2) |
| C1—O1—C5—C6    | 179.80 (19)  | C16—C15—C18A—C19A   | 94.2 (10)  |
| C5—C4—C7—C8    | -97.7 (3)    | C14—C15—C18A—C19A   | -73.0 (11) |
| C3—C4—C7—C8    | 80.1 (3)     | C18B—C15—C18A—C19A  | -176 (4)   |
| C4—C7—C8—C9    | -169.6 (2)   | C15—C18A—C19A—C20A  | 168.5 (7)  |
| C7—C8—C9—C10   | -71.9 (4)    | C18A—C19A—C20A—C21A | 67.1 (10)  |
| C16—O4—C12—O5  | -179.5 (2)   | C16—C15—C18B—C19B   | 96.2 (7)   |
| C16—O4—C12—C13 | 0.8 (3)      | C14—C15—C18B—C19B   | -93.0 (8)  |
| O5—C12—C13—C14 | 178.9 (2)    | C18A—C15—C18B—C19B  | -6 (2)     |
| O4—C12—C13—C14 | -1.5 (3)     | C15—C18B—C19B—C20B  | 173.5 (6)  |
| C22—O6—C14—C13 | -3.5 (3)     | C18B—C19B—C20B—C21B | 171.1 (8)  |
